# Supplementary material
Source: PubMed Central journal article supplement (PMC1748230)
Supplement: pnas_0609448103_1.pdf [file pnas_0609448103_1.pdf]

**Table 1.** Annual values of leaf area duration ( $L_d$ ), aboveground net primary production plus aboveground respiration (ANPP'), and net primary production (NPP) for each of the four FACE sites.

| Site                      | Species                              | Year | Ambient CO <sub>2</sub>                       |                                                  |      | Elevated CO <sub>2</sub>                      |                                                  |      |
|---------------------------|--------------------------------------|------|-----------------------------------------------|--------------------------------------------------|------|-----------------------------------------------|--------------------------------------------------|------|
|                           |                                      |      | $L_d$<br>(m <sup>2</sup> yr m <sup>-2</sup> ) | ANPP'<br>(g C m <sup>-2</sup> yr <sup>-1</sup> ) | NPP  | $L_d$<br>(m <sup>2</sup> yr m <sup>-2</sup> ) | ANPP'<br>(g C m <sup>-2</sup> yr <sup>-1</sup> ) | NPP  |
| Duke FACE*                | <i>Pinus taeda</i> ,<br>unfertilized | 1994 | 1.1                                           | 692                                              | 626  | 1.1                                           | 812                                              | 756  |
|                           |                                      | 1995 | 1.3                                           | 800                                              | 719  | 1.3                                           | 982                                              | 901  |
|                           |                                      | 1996 | 1.3                                           | 805                                              | 725  | 1.5                                           | 1005                                             | 915  |
|                           |                                      | 1997 | 1.2                                           | 819                                              | 731  | 1.3                                           | 1036                                             | 942  |
|                           |                                      | 1998 | 1.3                                           | 740                                              | 662  | 1.6                                           | 933                                              | 851  |
|                           |                                      | 1999 | 1.4                                           | 839                                              | 746  | 1.7                                           | 1028                                             | 931  |
|                           |                                      | 2000 | 1.4                                           | 913                                              | 809  | 1.7                                           | 1113                                             | 1003 |
|                           | <i>Pinus taeda</i> ,<br>fertilized   | 2001 | 1.6                                           | 738                                              | 656  | 1.9                                           | 963                                              | 871  |
|                           |                                      | 2002 | 1.5                                           | 545                                              | 490  | 1.8                                           | 688                                              | 633  |
|                           |                                      | 2003 | 1.2                                           | 629                                              | 565  | 1.5                                           | 833                                              | 761  |
|                           |                                      | 1999 | 1.6                                           | 995                                              | 876  | 1.9                                           | 1146                                             | 1028 |
|                           |                                      | 2000 | 1.8                                           | 1132                                             | 993  | 2.0                                           | 1261                                             | 1126 |
|                           |                                      | 2001 | 2.0                                           | 924                                              | 811  | 2.3                                           | 1142                                             | 1020 |
|                           |                                      | 2002 | 1.7                                           | 661                                              | 584  | 1.9                                           | 789                                              | 720  |
| AspenFACE <sup>†</sup>    | <i>Populus tremuloides</i>           | 2003 | 1.1                                           | 462                                              | 424  | 1.7                                           | 555                                              | 541  |
|                           |                                      | 2001 | 1.1                                           | 250                                              | 229  | 1.6                                           | 460                                              | 446  |
|                           | <i>Betula papyrifera</i>             | 2002 | 1.2                                           | 335                                              | 305  | 1.8                                           | 533                                              | 518  |
|                           |                                      | 2003 | 1.0                                           | 343                                              | 315  | 1.6                                           | 505                                              | 495  |
| ORNL-FACE <sup>‡</sup>    | <i>Liquidambar styraciflua</i>       | 1999 | 2.9                                           | 892                                              | 882  | 3.0                                           | 1021                                             | 1021 |
|                           |                                      | 2000 | 3.0                                           | 1036                                             | 972  | 3.3                                           | 1115                                             | 1137 |
|                           |                                      | 2001 | 2.9                                           | 980                                              | 1055 | 3.2                                           | 1035                                             | 1249 |
|                           |                                      | 2002 | 2.9                                           | 937                                              | 919  | 2.9                                           | 980                                              | 1229 |
| POP-EUROFACE <sup>§</sup> | <i>Populus alba</i>                  | 2000 | 4.0                                           | 1305                                             | 1132 | 3.9                                           | 1503                                             | 1341 |
|                           |                                      | 2001 | 4.8                                           | 1719                                             | 1493 | 4.5                                           | 2291                                             | 2029 |
|                           | <i>Populus nigra</i>                 | 2000 | 2.6                                           | 1288                                             | 1130 | 2.9                                           | 1599                                             | 1530 |
|                           |                                      | 2001 | 3.1                                           | 1688                                             | 1532 | 3.1                                           | 1980                                             | 1853 |
|                           | <i>Populus euramericana</i>          | 2000 | 4.1                                           | 1674                                             | 1437 | 4.4                                           | 1730                                             | 1562 |
|                           |                                      | 2001 | 5.0                                           | 2224                                             | 1983 | 5.1                                           | 2591                                             | 2413 |

$L_d$  was calculated as peak  $L$  (for deciduous forests) or growing season averaged  $L$  (conifer forest) multiplied by growing season length (as fraction of a year). NPP was calculated as the sum of production of wood, leaves, and coarse and fine roots (1). ANPP' was calculated as the sum of wood, leaves, and aboveground maintenance respiration [=0.25 x ANPP; (2)], or by subtracting coarse and fine roots from NPP and adding aboveground maintenance respiration.

\*Duke FACE: growing season averaged  $L$  and leaf production from this study and ref. 3; wood and coarse root production from this study using allometry (4, 5); fine root production from ref. 6.

<sup>†</sup>AspenFACE: peak  $L$  from ref. 1 multiplied by CO<sub>2</sub>-induced enhancement of leaf biomass (7); ANPP calculated as NPP minus coarse and fine root biomass production in ref. 7.

<sup>‡</sup>ORNL-FACE: peak  $L$  from ref. 8; ANPP calculated as NPP minus coarse and fine root biomass production in ref. 9.

<sup>§</sup>POP-EUROFACE: peak  $L$  from refs. 10, 11; ANPP calculated as NPP minus coarse and fine root biomass production in ref. 12.

1. Norby RJ, DeLucia EH, Gielen B, Calfapietra C, Giardina CP, King JS, Ledford J, McCarthy HR, Moore DJP, Ceulmans R, *et al.* (2005) *Proc Natl Acad Sci USA* 102:18052-18056.
2. Ryan MG (1991) *Tree Physiol* 9:255-266.
3. Phillips N, Oren R (2001) *Ecol App* 11:385-396.
4. Naidu SL, DeLucia EH, Thomas RB (1998) *Can J For Res* 28:1116-1124.
5. Schäfer KVR (2002) PhD thesis (Duke University, Durham, NC).
6. Matamala R, Schlesinger WH (2000) *Global Change Biol* 6:967-979.
7. King JS, Kubiske ME, Pregitzer KS, Hendrey GR, McDonald EP, Giardina CP, Quinn VS, Karnosky DF (2005) *New Phytol* 168:623-636.
8. Norby RJ, Sholtis JD, Gunderson CA, Jawdy SS (2003) *Oecologia* 136: 574-584.
9. Norby RJ, Ledford J, Reilly CD, Miller NE, O'Neill EG (2004) *Proc Natl Acad Sci USA* 101:9689-9693.
10. Gielen B, Liberloo M, Bogaert J, Calfapietra C, DeAngelis P, Miglietta F, Scarascia-Mugnozza G, Ceulmans R (2003) *Global Change Biol* 9:1022-1037.
11. Wittig VE, Bernacchi CJ, Zhu X-G, Calfapietra C, Ceulmans R, De Angelis P, Gielen B, Miglietta F, Morgan PB, Long SP (2005) *Global Change Biol* 11:644-656.
12. Gielen B, Calfapietra C, Lukac M, Wittig VE, De Angelis P, Janssens IA, Moscatelli MC, Grego S, Cotrufo MF, Godbold DL, *et al.* (2005) *Tree Physiol* 25:1399-1408.
